# Supplementary material for: ToxGen: an improved reference database for the identification of type B-trichothecene genotypes in Fusarium
Source: PubMed Central journal article supplement (PMC5314956; doi:10.7717/peerj.2992), 2017-02-15
Supplement: peerj-05-2992-s001.pdf [file peerj-05-2992-s001.pdf]

# PlutoF main page

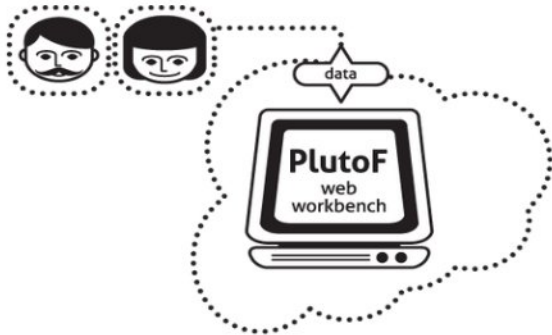

Log in to access the database as a user

Create, manage, share, analyse and publish biology-related databases and projects

[See more](#)

## News

PlutoF and Pensoft started to develop new publishing systems, In November 9-12, PlutoF team visited academic publishing company Pensoft in Bulgaria. The aim was to develop prototype connecting the two systems - Pensoft's ARPHA writing tool and PlutoF Biodiversity Platform. This is multi-phase development project.

Estonian bird observations are published in global biodiversity portal GBIF Regular bird observations and observations made with mobile application "Minu loodusheli" are now available through GBIF portal. Original source of data is PlutoF - information system for biodiversity developed by the Natural History Museum (University of Tartu).

[See more](#)

## Workbench modules

- Projects
- Collections
- Monitoring and Conservation
- Taxonomy
- Ecology

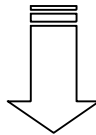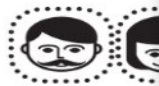

- Specimens
- Observations
- Sequences
- Living Specimens
- Reference Based
- Material Samples

Click on Living Specimens to search strain metadata (A)

Click on Sequences to search sequence data (B)

Create, manage, share, analyse and publish biology-related databases and projects

[See more](#)

## News

PlutoF and Pensoft started to develop new publishing systems, In November 9-12, PlutoF team visited academic publishing company Pensoft in Bulgaria. The aim was to develop prototype connecting the two systems - Pensoft's ARPHA writing tool and PlutoF Biodiversity Platform. This is multi-phase development project.

Estonian bird observations are published in global biodiversity portal GBIF Regular bird observations and observations made with mobile application "Minu loodusheli" are now available through GBIF portal. Original source of data is PlutoF - information system for biodiversity developed by the Natural History Museum (University of Tartu).

[See more](#)

## Workbench modules

- Projects
- Collections
- Monitoring and Conservation
- Taxonomy
- Ecology

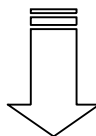

# Searching for strain metadata (A)

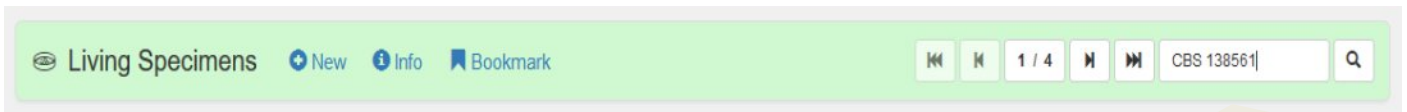

Enter strain code and click on search

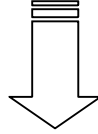

Search string: CBS 138561  Search over all fields Module: Living Specimens Filters Search

Active filters

List view Image view Map view

50 Found 1 results for "CBS 138561".

| Top taxa                          | Top countries | Top collectors | Top collections                  |
|-----------------------------------|---------------|----------------|----------------------------------|
| Gibberella zeae (Schwein.) P... 1 | Poland 1      | Tomasz Kulik 1 | CBS - Centraalbureau voor S... 1 |

| # | Record | Last modified    | Name       | Rights holder | Taxon node                                                         |
|---|--------|------------------|------------|---------------|--------------------------------------------------------------------|
| 1 |        | 2016-08-26 08:31 | CBS 138561 | Tomasz Kulik  | Gibberella zeae (Schwein.) Petch, 1936 (as Fusarium graminearum... |

Click on strain code to access metadata

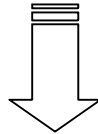

## Accessing metadata

Most recent taxonomic affiliations

**Taxon name**  
Fusarium graminearum  
(current)

**Taxon name (add.)**  
sensu stricto

**Isolation date**  
2010-08-31

**Isolated from**

Isolation source

**Isolated in**

**Isolation remarks**  
Isolated from wheat kernel.

Culture collections maintaining the strain with all available strain codes

**Code**  
CBS 138561

**Remarks**  
Deposited by T. Kulik

**Additional Identifiers**  
1001t (Department of Botany and Nature Protection, UWM in Olsztyn, Poland)

**Deposited in**  
CBS - Centraalbureau voor Schimmelcultures

**Form name**  
Living culture: default

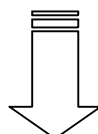

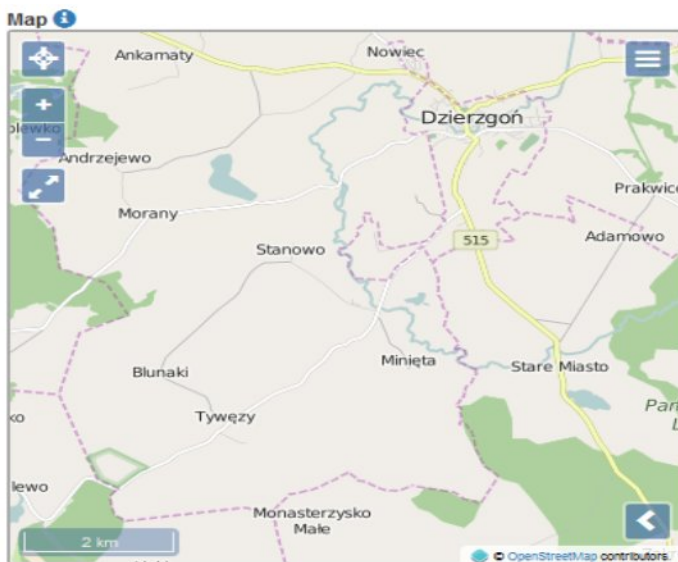

#### 📍 Sampling Area

**Name**  
Dzierzgoń, Tywęży

#### **Country**

Poland

#### **Latitude**

#### **Longitude**

#### **State**

#### **District**

#### **Commune/City**

Dzierzgoń

#### **Locality text**

Tywęży

#### **Accuracy (m)**

#### **Method**

#### **Elevation (min) (m)**

#### **Elevation (max) (m)**

#### **Depth (min) (m)**

#### **Depth (max) (m)**

#### 🕒 Sampling Event

**Timespan begin**

**Timespan end**

**Event description**

Geographic origin

Chemotype determination

**Chemotype**  
15ADON

Genotype determination

**Tri12 genotype**  
15ADON

Mycotoxin production

**Substrate/medium remarks**  
The strain produced DON  
( $2.16 \pm 0.94$  mg/kg), 3ADON  
( $1.6 \pm 0.3$  mg/kg), 15ADON  
( $1.42 \pm 0.48$  mg/kg), NIV ( $0.12 \pm$   
 $0.02$  mg/kg) and 4ANIV ( $0.96 \pm$   
 $0.01$  mg/kg) on YES medium

# Searching for sequence data (B)

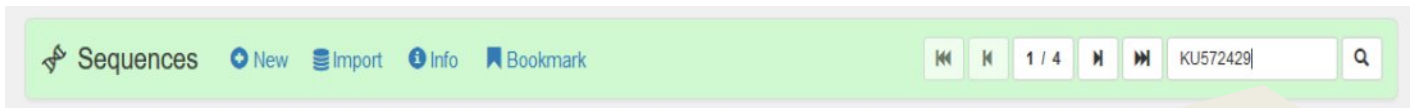

Enter accession number and click on search

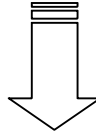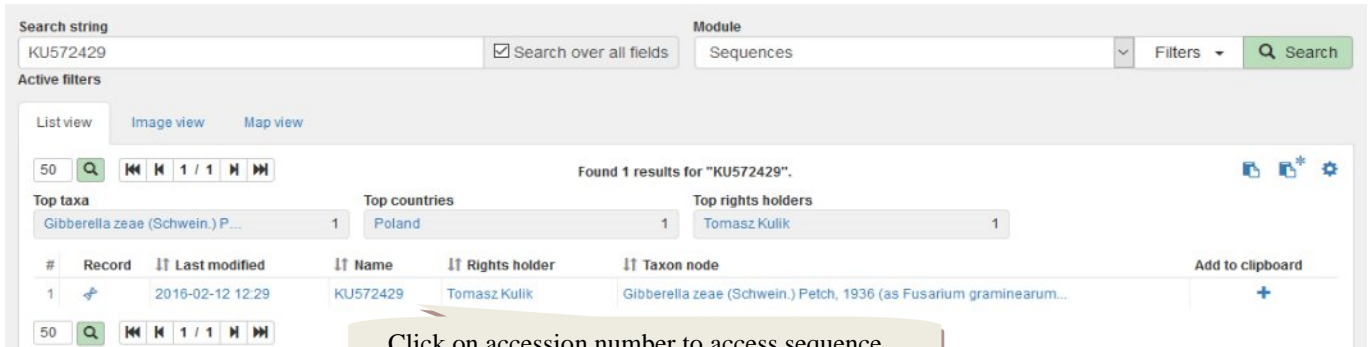

Click on accession number to access sequence

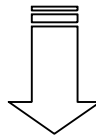

# Accessing sequence data

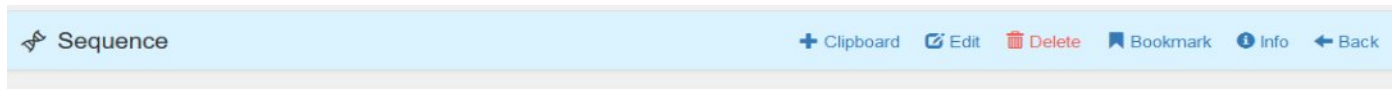

## General Data

|                                                  |                                           |
|--------------------------------------------------|-------------------------------------------|
| <b>Sequence ID</b><br>KU572429                   | <b>Sampling Event</b><br>Dzierżoń, Tywęzy |
| <b>Linked to</b><br>CBS 138561 (Living Specimen) | <b>Sequenced regions:</b><br>Tri12        |

**Sequence**  
ATGACTGCTACAGTTCACGAAAAAGGTGTCGACCTTGAATCTCAGCCAGACGACAGGTTGCGAGCCCAAGCCCTCGCCACTACAGCCGATGAGCTTCCAGAAGGATATTACACCTCGCCTCGTGATAGCTTCTTCCG  
CAGGGTTCTCTCAATGTCTGCACTACCTACTTTGTTCTTCAAGCATCAGCCTCTGCTCTTCCCAACATTCTCCAGGACATTGGCCAGAGCGATAACCAAGTCTCTTCTCGACTCATGGAGATGGGTCAAGCTGTCA  
GCATCCTGGTGATGGGTCTGTTACGGATAGATTTGGGCGACGACCATTTGTCATAGCTACTCATATCCTTGGCCCTTGTGGTGCTATCGTTGGATGCACAGCTAACAAAGTTCAATAOCCCTCTGGOTGCCATGACAATGCT  
CGGGTTGCTGCTGGTCCAGCAGGTCTAGCCCTCATTCATTGGCGAACTGATGAGTAACAACAAGTTCTTGGTCTCCTCGCTGTAAGTGTCCCCAGCAITGTCATGACTGCTGGCCCCACTTGGGTGAGCG  
TCTCAGCATAAAAGCAGTTGGCGTTGGATCTTTACATCTATATCATCATGAGTAGTAAGTTGCCCTTCTTGTATCGAATGCATGGTAATGATGTTGACATGTATACAGCGGTGCAACTTCACCTATCGTTGTTGGTACCA  
CCCTCCGTCATTTACGCAACTTCATGGCAAAAAGGCTCGCAAGAGGGATGAACGGCAAGCTCGACTGGATAGGTTCTTCCCTTGTACCCGCGGAGTATCCCTCTTTCTCCTTGGTGCTCCTGGGGAGGCAAGCC  
GAACAGCGCTTGAACCTCTGTAAGATATCGGACTAATGACATCTGGCCCTTGGCTCTCTACTTGTGTTCCGCTTGTACGAGGCTTTGGCAAGCCGAGCGACCTATGGTCCCGCCTGGCCTCTTAAAGGACACCCGC  
GGCTTTGTGCTGATCCTCTAATCAGCTCCATAATGGGCGGATGAATCTTGTCTCACAATCATTACCCTCAGCAAGTCTAATATCTTCCGATCCAGTTTGA AAAACTGGGAAGAGACTGCATGGATGACAGCGACTGC  
CGCATTCGGTACATGGGCTGGTATATGGTTCTGGGAACTTGTCCATCTCATCAGGCATATCCGCTGGCAATACTTCCGGGGCTATATGGCTCACGGCTTTCCTAGGAGCTATGTCATCTATCAATCGAGATAACAAGA  
ACGCAAGCCATCGCTTTGTCATCTTTGGCCGGCTTGTGTCTCCTGGGCTCAGGACATCACCATGCTCATGGTTCAAGTTTATCACGACAGATGAAGATTTGGGTGAGCTTTCTGTATGATTCCTACTTGTATTGTTGAGAT  
GTTTCTAACAAAGTCGTTAGCTGTTGTTGCTGCTTCCCGCCCTTTTTGGCTCCATTTTCAACCGCCGCTTTCATATCCCTCTACAGCAACAGTACCCAAAACAATTGGAAGCCATCTGACTTCAGCCCTGCCGAGGTA  
CGGACATCCACAGTCTCTTCCCGAGTCTTCTGAGGCTGCCAAGACGGGGCGGATAGATGCTGTCAAGGCTCTCCCTGGGATGACGAACAGCACTGCTACGGTGGTCAGCCGAGCTATGGCGGATGTTACACAG  
CTTCATATGCTAATGTCTACTACTTCGCTATGGCACTGGGAGTCATTCCAATCATTGCCAGCCTCTATATGAGGGACTTGGACCAATACCTCACAGACCATGTTCCGCATCAGCTTTATGATAGAAAATAAGCGGATAAGGACGT  
ACTTGAGGGAGATTCCGATTCGACGTCATCTCCAACATACTTCAATTGTTGACGATAAGACGCAA

**Remarks**  
15ADON genotype  
isolation source

**EcM lineage**

Information on genotype
