# Supplementary material for: ToxGen: an improved reference database for the identification of type B-trichothecene genotypes in Fusarium
Source: PubMed Central journal article supplement (PMC5314956; doi:10.7717/peerj.2992), 2017-02-15
Supplement: peerj-05-2992-s002.pdf [file peerj-05-2992-s002.pdf]

# Setting up BLAST search

## General Data

Analysis type:

Name:  Paste Tri12 sequences into BLAST input box

Choose input file in FASTA format:

Paste 1-1000 sequences in FASTA format

```
>
ATGACTGCTACAGTTCACGAAAAGGTGTCGACCTGAATCTCAGCCAGACGACAGGTTGCGAGCCCAAGCC
CTCGCCACTACAGCCGATGAGCTTCCAGAGGGATATTACACCTCGCCTCGTGTGATAGCTTCCTTCGCAGGG
TTCTCTCTCAATGTCTGCACTACCTACTTTGTTCTTCAAGCATCAGCCTCTGCTCTTCCAACATTCTCCAGGA
CATTGGCCAGAGCGATAACCAAAGTCTCTTCTCGACTCTATGGACGATGGGTCAAGCTGTCAGCATCCTGGT
GATGGGTGCTCTTACGGATAGATTTGGGCGACGACCATTGTGCATAGCTACTCATATCCTTGGCCTTGTGGT
```

## Program Parameters

No of alignments:

Output style:  Select ToxGen

Algorithm parameters:

Unite  GenBank  Environmental  ToxGen

These are the finalized results of your BLAST run.

[You can click here for a very condensed summary of the results](#)

```
# BLASTN 2.2.26 [Sep-21-2011]
# Database: data/dbs4plutof/tri12
# Mode: ultra condensed output
Additional UNITE taxon name is in gray colour.
```

```
Query - The name of the query (input) sequence
Reference - The name of the reference sequence
Score - The BLAST score
E-value - The BLAST E-value
Prcnt - Percent identity over the BLAST alignment
MisM - The number of mismatches over the BLAST alignment
Qstart - The position in the query sequence where the BLAST alignment starts
Qend - The position in the query sequence where the BLAST alignment ends
Rstart - The position in the reference sequence where the BLAST alignment starts
Rend - The position in the reference sequence where the BLAST alignment ends
```

Click on the strain code to view strain metadata

| Query 1 of | Reference                                                            | Score | E-value | Prcnt  | MisM | Qstart | Qend | Rstart |
|------------|----------------------------------------------------------------------|-------|---------|--------|------|--------|------|--------|
|            | 530092 AB060689 Gibberella zeae (as Fusarium graminearum)            |       |         |        |      |        |      |        |
|            | <a href="#">AB060689</a>   Gibberella zeae (as Fusarium graminearum) | 3520  | 0.0     | 100.00 | 0000 | 1      | 1906 | 1      |
|            | <a href="#">AY102575</a>   Fusarium asiaticum                        | 3515  | 0.0     | 99.95  | 0001 | 1      | 1906 | 1      |
|            | <a href="#">AY102604</a>   Fusarium asiaticum                        | 3487  | 0.0     | 99.69  | 0006 | 1      | 1906 | 1      |
|            | <a href="#">KX197185</a>   Fusarium                                  | 3290  | 0.0     | 97.85  | 0035 | 1      | 1906 | 1      |
|            | <a href="#">KX197188</a>   Fusarium louisianense                     | 3256  | 0.0     | 97.54  | 0041 | 1      | 1906 | 1      |
|            | <a href="#">KM408169</a>   Fusarium ussurianum                       | 3256  | 0.0     | 97.54  | 0041 | 1      | 1906 | 1      |
|            | <a href="#">KU572426</a>   Fusarium culmorum                         | 3057  | 0.0     | 95.65  | 0074 | 1      | 1906 | 1      |
